# Supplementary material for: Health-related quality of life in patients accessing medicinal cannabis in Australia: The QUEST initiative results of a 3-month follow-up observational study
Source: PubMed Central journal article supplement (PMC10482296; doi:10.1371/journal.pone.0290549), 2023-09-06

**S3 Fig.** Change in categorized severity levels of anxiety and depression between baseline and mean follow-up.

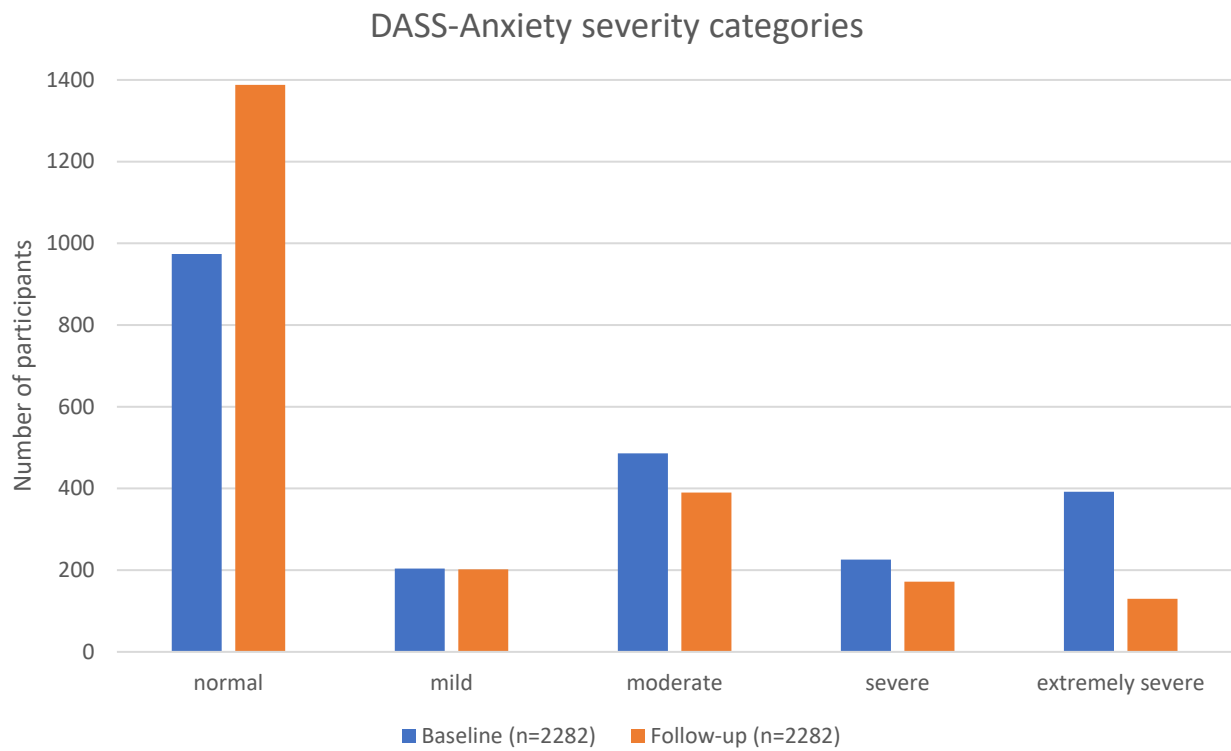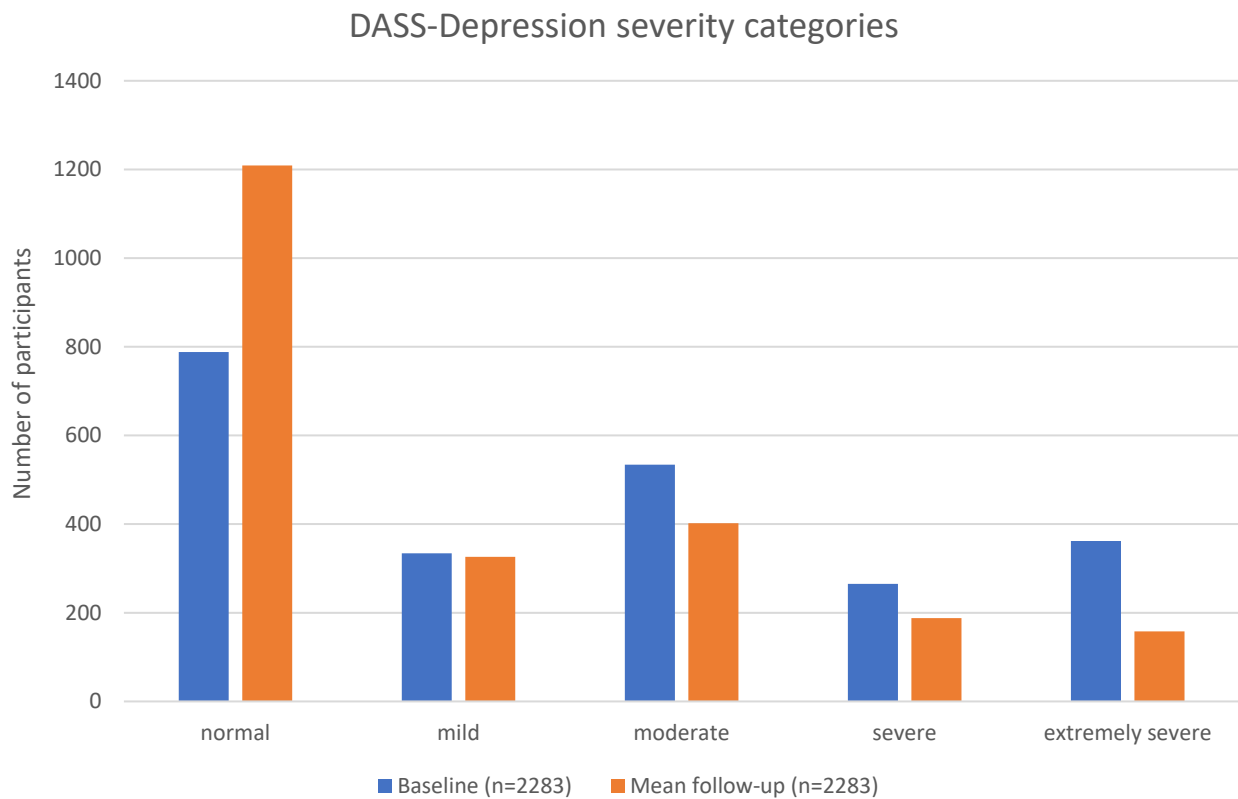

Supplement: pone.0290549.s001.pdf [file pone.0290549.s001.pdf]
