# Supplementary material for: Health-related quality of life in patients accessing medicinal cannabis in Australia: The QUEST initiative results of a 3-month follow-up observational study
Source: PubMed Central journal article supplement (PMC10482296; doi:10.1371/journal.pone.0290549), 2023-09-06

**S4 Fig.** Change in Mean EQ-5D-5L Utility Scores and QLQ-C30 Summary Scores over study period stratified by time on study (with standard error bars)

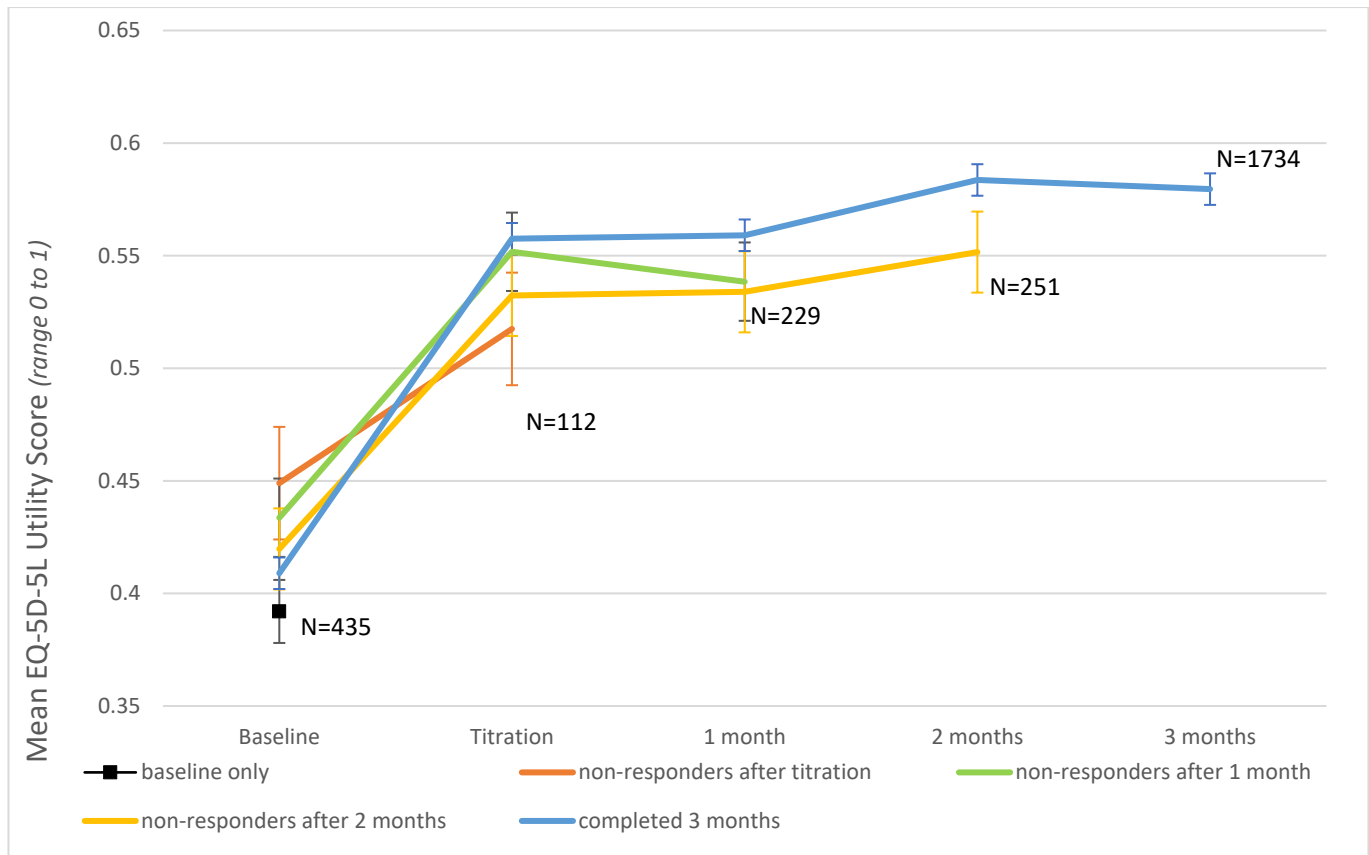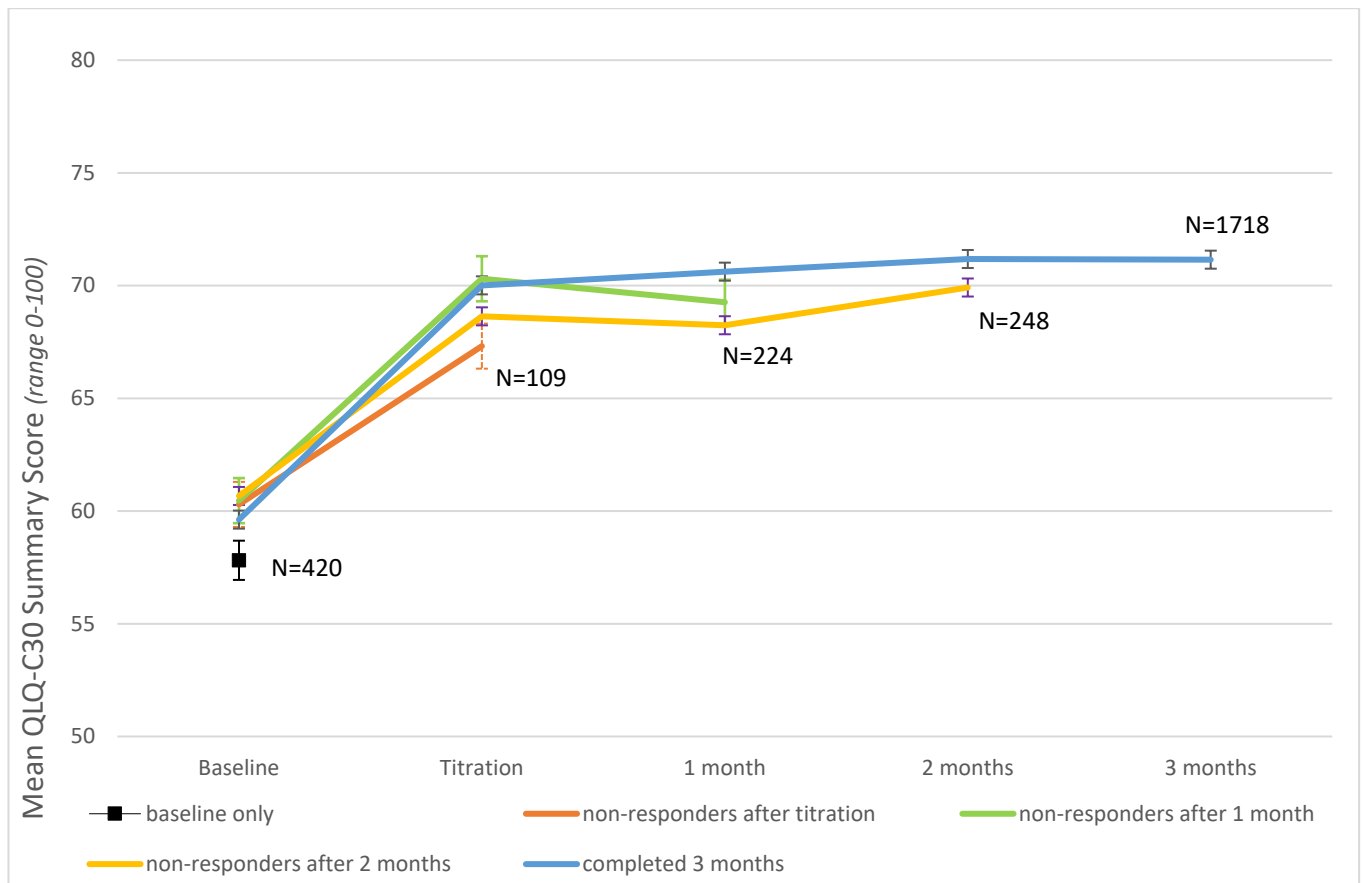

Supplement: pone.0290549.s002.pdf [file pone.0290549.s002.pdf]
