# Supplementary material for: Health-related quality of life in patients accessing medicinal cannabis in Australia: The QUEST initiative results of a 3-month follow-up observational study
Source: PubMed Central journal article supplement (PMC10482296; doi:10.1371/journal.pone.0290549), 2023-09-06
Supplement: pone.0290549.s003.pdf [file pone.0290549.s003.pdf]

**S1 Table.** Location, ethnicity, and gender identity of 2327 participants in the QUEST Initiative study.

| <b>Australian Location</b>                        | <b>N=2327</b> | <b>%</b> |
|---------------------------------------------------|---------------|----------|
| New South Wales                                   | 899           | 38.6     |
| Victoria                                          | 225           | 9.7      |
| Queensland                                        | 348           | 15.0     |
| South Australia                                   | 103           | 4.4      |
| Western Australia                                 | 743           | 31.9     |
| Australian Capital Territory                      | 9             | 0.4      |
| <b>Ethnicity<sup>a</sup></b>                      |               |          |
| Aboriginal and/or Torres Strait Islander          | 54            | 2.3      |
| Other Australian                                  | 1297          | 55.7     |
| New Zealander                                     | 64            | 2.8      |
| Melanesian and Papuan, Micronesian, or Polynesian | 5             | 0.2      |
| British                                           | 371           | 16.0     |
| Irish                                             | 69            | 3.0      |
| North-West European                               | 117           | 5.0      |
| Southern and Eastern European                     | 123           | 5.3      |
| North African and Middle Eastern                  | 18            | 0.8      |
| South-East Asian                                  | 19            | 0.8      |
| North-East Asian                                  | 21            | 0.9      |
| Southern and Central Asian                        | 23            | 1.0      |
| North American                                    | 35            | 1.5      |
| Central and South American                        | 30            | 1.3      |
| Sub-Saharan African                               | 25            | 1.0      |
| Missing                                           | 56            | 2.4      |
| <b>Gender Identity</b>                            |               |          |
| Man                                               | 813           | 34.9     |
| Woman                                             | 1372          | 59.0     |
| Transgender                                       | 2             | 0.1      |
| Genderqueer                                       | 4             | 0.2      |
| Agender                                           | 2             | 0.1      |
| Genderless                                        | 1             | -        |
| Non-binary                                        | 13            | 0.6      |
| Trans man                                         | 1             | -        |
| Two-spirit                                        | 1             | -        |
| Genderfluid                                       | 4             | 0.2      |
| Prefer not to disclose                            | 6             | 0.3      |
| Missing                                           | 108           | 4.6      |

<sup>a</sup> Self-selected options from list adapted from Australian Bureau of Statistics – Australian Standard Classification of Cultural and Ethnic groups, 2019.
