# Supplementary material for: Health-related quality of life in patients accessing medicinal cannabis in Australia: The QUEST initiative results of a 3-month follow-up observational study
Source: PubMed Central journal article supplement (PMC10482296; doi:10.1371/journal.pone.0290549), 2023-09-06
Supplement: pone.0290549.s005.pdf [file pone.0290549.s005.pdf]

STROBE Statement—checklist of items that should be included in reports of observational *cohort* studies

|                              | <b>Item No.</b> | <b>Recommendation</b>                                                                                                                                                                | <b>Page No.</b> | <b>Relevant text from manuscript</b>                                               |
|------------------------------|-----------------|--------------------------------------------------------------------------------------------------------------------------------------------------------------------------------------|-----------------|------------------------------------------------------------------------------------|
| <b>Title and abstract</b>    | 1               | (a) Indicate the study’s design with a commonly used term in the title or the abstract                                                                                               | 1               | 3-month follow-up observational study                                              |
|                              |                 | (b) Provide in the abstract an informative and balanced summary of what was done and what was found                                                                                  | 2               | Abstract - AMRaC structured                                                        |
| <b>Introduction</b>          |                 |                                                                                                                                                                                      |                 |                                                                                    |
| Background/rationale         | 2               | Explain the scientific background and rationale for the investigation being reported                                                                                                 | 4               | Introduction - First 3 paragraphs                                                  |
| Objectives                   | 3               | State specific objectives, including any prespecified hypotheses                                                                                                                     | 5               | This study is reporting the...<br>which is assessing...<br>We hypothesised that... |
| <b>Methods</b>               |                 |                                                                                                                                                                                      |                 |                                                                                    |
| Study design                 | 4               | Present key elements of study design early in the paper                                                                                                                              | 5               | Methods - Study population and design                                              |
| Setting                      | 5               | Describe the setting, locations, and relevant dates, including periods of recruitment, exposure, follow-up, and data collection                                                      | 5-6             | Methods - Study population and design<br>Methods - Data Collection                 |
| Participants                 | 6               | (a) <i>Cohort study</i> —Give the eligibility criteria, and the sources and methods of selection of participants. Describe methods of follow-up                                      | 5-6             | Methods - Study population and design<br>Methods - Data Collection                 |
|                              |                 | (b) <i>Cohort study</i> —For matched studies, give matching criteria and number of exposed and unexposed                                                                             | n/a             |                                                                                    |
| Variables                    | 7               | Clearly define all outcomes, exposures, predictors, potential confounders, and effect modifiers. Give diagnostic criteria, if applicable                                             | 5               | Methods - Study population and design                                              |
|                              |                 |                                                                                                                                                                                      | 7-8             | Methods - Data Collection Table 1                                                  |
| Data sources/<br>measurement | 8               | For each variable of interest, give sources of data and details of methods of assessment (measurement). Describe comparability of assessment methods if there is more than one group | 7-8             | Methods - Data Collection Table 1                                                  |
| Bias                         | 9               | Describe any efforts to address potential sources of bias                                                                                                                            | 20-21           | Discussion - Strengths and limitations                                             |

|                        | <b>Item No.</b> | <b>Recommendation</b>                                                                                                                                                                             | <b>Page No.</b> | <b>Relevant text from manuscript</b>                                    |
|------------------------|-----------------|---------------------------------------------------------------------------------------------------------------------------------------------------------------------------------------------------|-----------------|-------------------------------------------------------------------------|
| Study size             | 10              | Explain how the study size was arrived at                                                                                                                                                         | 9               | Methods – Statistical significance                                      |
| Quantitative variables | 11              | Explain how quantitative variables were handled in the analyses. If applicable, describe which groupings were chosen and why                                                                      | 7-9             | Methods – Data Collection Table 1<br>Methods – Statistical significance |
| Statistical methods    | 12              | (a) Describe all statistical methods, including those used to control for confounding                                                                                                             | 9<br>13         | Methods – Statistical significance<br>Results - PROs                    |
|                        |                 | (b) Describe any methods used to examine subgroups and interactions                                                                                                                               | 9-10            | Methods – Statistical analysis                                          |
|                        |                 | (c) Explain how missing data were addressed                                                                                                                                                       | 9               | Methods – Statistical significance                                      |
|                        |                 | (d) <i>Cohort study</i> —If applicable, explain how loss to follow-up was addressed                                                                                                               | 9               | Methods - Study population and design                                   |
|                        |                 | (e) Describe any sensitivity analyses                                                                                                                                                             | 17<br>9-10      | Results – Missed assessments<br>Methods – Statistical analysis          |
| <b>Results</b>         |                 |                                                                                                                                                                                                   |                 |                                                                         |
| Participants           | 13              | (a) Report numbers of individuals at each stage of study—eg numbers potentially eligible, examined for eligibility, confirmed eligible, included in the study, completing follow-up, and analysed | 10              | Results<br>Figures 1-3<br>Table 3                                       |
|                        |                 | (b) Give reasons for non-participation at each stage                                                                                                                                              |                 | Results Figure 1                                                        |
|                        |                 | (c) Consider use of a flow diagram                                                                                                                                                                |                 | Results Figure 1                                                        |
| Descriptive data       | 14              | (a) Give characteristics of study participants (eg demographic, clinical, social) and information on exposures and potential confounders                                                          | 11              | Results<br>and Table 2; Appendix A;<br>Appendix B                       |
|                        |                 | (b) Indicate number of participants with missing data for each variable of interest                                                                                                               |                 | Figures 2-3                                                             |
|                        |                 | (c) <i>Cohort study</i> —Summarise follow-up time (eg, average and total amount)                                                                                                                  | 6               | Methods – Data Collection                                               |
| Outcome data           | 15              | <i>Cohort study</i> —Report numbers of outcome events or summary measures over time                                                                                                               | 13-17           | Results<br>and Table 3                                                  |

|                          | <b>Item No.</b> | <b>Recommendation</b>                                                                                                                                                                                        | <b>Page No.</b> | <b>Relevant text from manuscript</b>                                       |
|--------------------------|-----------------|--------------------------------------------------------------------------------------------------------------------------------------------------------------------------------------------------------------|-----------------|----------------------------------------------------------------------------|
| Main results             | 16              | (a) Give unadjusted estimates and, if applicable, confounder-adjusted estimates and their precision (eg, 95% confidence interval). Make clear which confounders were adjusted for and why they were included | 13-17           | Results and Table 3                                                        |
|                          |                 | (b) Report category boundaries when continuous variables were categorized                                                                                                                                    | 8               | <i>Methods - Table 1</i><br><i>Results - Figure 3</i><br><i>Appendix c</i> |
|                          |                 | (c) If relevant, consider translating estimates of relative risk into absolute risk for a meaningful time period                                                                                             | n/a             |                                                                            |
| Other analyses           | 17              | Report other analyses done—eg analyses of subgroups and interactions, and sensitivity analyses                                                                                                               | 13-17           | Results                                                                    |
| <b>Discussion</b>        |                 |                                                                                                                                                                                                              |                 |                                                                            |
| Key results              | 18              | Summarise key results with reference to study objectives                                                                                                                                                     | 18              | Discussion – Principal findings                                            |
| Limitations              | 19              | Discuss limitations of the study, taking into account sources of potential bias or imprecision. Discuss both direction and magnitude of any potential bias                                                   | 20-21           | Discussion – Strengths and limitations                                     |
| Interpretation           | 20              | Give a cautious overall interpretation of results considering objectives, limitations, multiplicity of analyses, results from similar studies, and other relevant evidence                                   | 22              | Discussion – Clinical implications                                         |
| Generalisability         | 21              | Discuss the generalisability (external validity) of the study results                                                                                                                                        | 20-21           | Discussion – Strengths and limitations                                     |
| <b>Other information</b> |                 |                                                                                                                                                                                                              |                 |                                                                            |
| Funding                  | 22              | Give the source of funding and the role of the funders for the present study and, if applicable, for the original study on which the present article is based                                                | 24              | Declarations - Funding                                                     |

**Note:** An Explanation and Elaboration article discusses each checklist item and gives methodological background and published examples of transparent reporting. The STROBE checklist is best used in conjunction with this article (freely available on the Web sites of PLoS Medicine at <http://www.plosmedicine.org/>, Annals of Internal Medicine at <http://www.annals.org/>, and Epidemiology at <http://www.epidem.com/>). Information on the STROBE Initiative is available at [www.strobe-statement.org](http://www.strobe-statement.org).
